# Supplementary material
Source: publisher site journal article supplement (https://www.spandidos-publications.com/460/downloadSupplementary)
Supplement: Supplementary file 1 [file downloadSupplementary]

## Sheet: Sheet1
Table SIV. Clinical information of 312 patients and the expression levels of the indicated four miRNAs.
WHO type	EBV	VCA-IgA	EA-IgA	AJCC7-T stage	AJCC7-N stage	AJCC7-TNM stage	Overall survival time	Survival status	Disease-free survival time	Disease status	Distant metastasis-free survival time	Metastasis status	Relapse-free survival time	Relapse status	Radiotherapy interupt	Radiotherapy boosting	Cocurrent chemotherapy	Sample	hsa-miR-29b	hsa-miR-29c	hsa-miR-142-3p	hsa-miR-150
3	1	1280	320	3	3	4	8.2	1	0.966667	1	0.966667	1	8.2	0	1	1	0	GSM816180	9.38741	9.15465	9.15763	10.6579
3	1	1280	160	3	1	3	23.5333	1	1.73333	1	1.73333	1	23.5333	0	0	0	1	GSM816230	9.85669	10.4859	9.10674	10.3905
3	1	640	40	4	1	4	20.6667	1	3	1	3	1	20.6667	0	0	0	1	GSM816184	9.38741	10.0891	9.39567	10.6453
3	1	40	0	2	1	2	8.1	1	3.1	1	3.1	1	8.1	0	1	0	1	GSM816272	9.05599	9.45822	8.8204	10.2372
3	1	40	0	4	3	4	3.7	0	3.7	0	3.7	0	3.7	0	0	0	1	GSM816275	9.77002	10.4972	9.10379	11.8619
3	1	640	160	4	2	4	9.53333	1	4.3	1	5.03333	1	4.3	1	1	1	1	GSM816253	8.38262	8.56709	8.22619	8.75902
3	1	160	0	1	3	4	5.2	0	5.2	0	5.2	0	5.2	0	0	0	1	GSM816187	9.42006	10.5821	9.10974	10.696
3	0	0	0	3	2	3	6.8	1	5.76667	1	5.76667	1	5.76667	1	0	0	1	GSM816242	8.22878	8.0867	8.53495	8.80307
3	1	640	160	1	3	4	21.2667	1	6.9	1	6.9	1	21.2667	0	0	1	1	GSM816116	8.55507	9.4875	8.42994	9.0584
3	1	640	10	4	1	4	11.1667	1	6.96667	1	6.96667	1	6.96667	1	1	1	1	GSM816270	8.34396	8.78666	7.89299	9.16384
3	1	160	40	4	3	4	8.33333	1	7	1	7	1	7	1	0	1	1	GSM816163	9.6629	10.3905	10.0891	9.85046
3	1	160	20	4	3	4	22.5667	1	7	1	7	1	22.5667	0	1	0	1	GSM816256	8.70749	8.95298	7.98833	9.59756
3	1	640	80	4	1	4	16.5667	1	7.23333	1	7.23333	1	16.5667	0	0	0	0	GSM816057	10.2551	9.54167	9.02427	10.5946
3	1	80	0	2	1	2	13.7333	1	7.66667	1	7.66667	1	13.7333	0	0	0	1	GSM816183	9.69642	8.63442	9.4875	11.3088
1	1	40	0	2	1	2	62.9667	0	7.73333	1	7.73333	1	62.9667	0	1	0	1	GSM816214	9.01354	9.33182	8.78293	9.84427
3	1	320	20	4	2	4	16.5333	1	7.9	1	7.9	1	16.5333	0	0	1	1	GSM816278	7.79121	9.19232	8.44016	8.83418
3	1	320	40	4	3	4	32.2333	1	8.36667	1	8.36667	1	32.2333	0	0	0	1	GSM816302	10.0112	9.89006	9.10674	10.4009
3	1	320	40	4	2	4	15	1	8.43333	1	8.83333	1	8.43333	1	1	1	1	GSM816071	9.03679	9.14592	9.29513	9.35876
3	1	640	40	1	1	2	13.1667	1	8.86667	1	8.86667	1	13.1667	0	1	0	0	GSM816195	8.64605	9.15763	8.82232	9.71286
3	1	640	160	2	3	4	15.1333	1	8.93333	1	8.93333	1	8.93333	1	0	0	1	GSM816175	9.45822	9.71286	9.94591	9.41169
3	1	160	0	4	2	4	17.4333	1	9.06667	1	9.06667	1	17.4333	0	0	1	1	GSM816164	10.026	10.3905	10.5083	10.3609
3	1	320	80	4	1	4	62.5333	0	9.63333	1	9.63333	1	27.2667	1	0	0	1	GSM816326	8.48693	8.9099	8.13887	9.74712
3	1	320	20	3	3	4	9.73333	0	9.73333	0	9.73333	0	9.73333	0	1	0	0	GSM816268	7.94224	8.41024	8.36705	9.00101
3	1	160	40	4	1	4	65.7	0	10.3667	1	10.3667	1	65.7	0	0	1	0	GSM816055	9.71286	9.44129	9.94591	9.98923
3	1	640	80	2	3	4	18.9333	1	10.4667	1	10.4667	1	18.9333	0	1	1	1	GSM816134	8.91663	9.13411	8.19626	10.4327
3	1	320	40	2	0	2	11.0333	0	11.0333	0	11.0333	0	11.0333	0	0	1	1	GSM816107	9.98923	10.274	10.5323	10.3702
3	1	1280	320	2	3	4	27.0667	1	11.8333	1	11.8333	1	27.0667	0	1	1	1	GSM816284	9.38741	9.48331	8.53822	10.5946
3	1	320	10	4	1	4	20.0333	1	11.8667	1	11.8667	1	20.0333	0	0	1	1	GSM816155	9.76383	10.8928	9.8693	10.5323
3	1	80	0	3	3	4	13.2333	1	11.9333	1	11.9333	1	13.2333	0	0	0	1	GSM816088	9.01913	10.0725	9.32411	10.1901
3	1	320	40	2	2	3	18.8	1	12.1667	1	12.1667	1	18.8	0	1	0	1	GSM816224	8.22878	8.70387	8.43514	8.96219
3	1	160	10	3	3	4	12.2	1	6.63333	1	12.2	0	6.63333	1	1	0	1	GSM816168	9.75309	9.46265	9.12526	9.8693
3	1	320	20	1	3	4	21.0667	1	12.2333	1	12.2333	1	21.0667	0	0	1	1	GSM816343	8.71455	8.73577	9.37954	9.42391
3	1	640	80	4	1	4	12.4	1	9.06667	1	12.4	0	9.06667	1	0	1	1	GSM816068	9.44129	10.034	9.64751	11.2012
3	1	160	0	2	1	2	19.4667	1	12.4667	1	12.4667	1	19.4667	0	0	0	1	GSM816148	8.9367	9.24284	8.53668	11.1658
3	1	320	80	2	3	4	73.4333	0	12.8667	1	12.8667	1	73.4333	0	1	0	1	GSM816150	8.77352	9.10379	9.0638	9.55546
3	1	320	80	3	3	4	27.3333	1	13.0333	1	13.0333	1	27.3333	0	0	0	1	GSM816048	8.29881	8.69528	8.41024	10.9689
3	0	0	0	3	2	3	17.9667	1	13.3333	1	13.3333	1	17.9667	0	1	0	1	GSM816213	8.95985	10.0112	9.14305	9.09802
3	1	640	40	4	2	4	14.2333	0	14.2333	0	14.2333	0	14.2333	0	0	1	1	GSM816244	9.2394	9.81913	9.09507	9.79416
3	1	640	160	4	1	4	14.7667	0	14.7667	0	14.7667	0	14.7667	0	0	0	1	GSM816330	8.50816	9.49231	8.30311	9.22518
3	1	160	20	3	1	3	28.7	1	14.8667	1	14.8667	1	28.7	0	1	0	1	GSM816186	8.58669	8.86791	8.70387	9.2879
3	1	320	10	4	1	4	50.1333	1	15.0333	1	15.0333	1	50.1333	0	0	0	1	GSM816274	9.48331	9.87565	9.09507	9.20508
3	1	160	40	2	3	4	29.6333	1	15.3	1	15.3	1	29.6333	0	1	0	1	GSM816263	8.82232	9.40754	8.3362	9.56471
3	1	40	0	4	2	4	44.2667	1	15.4333	1	15.4333	1	44.2667	0	1	1	0	GSM816257	8.89287	9.10379	8.50655	9.67383
3	1	640	40	1	3	4	21.5667	1	15.2333	1	15.6333	1	15.2333	1	1	0	1	GSM816185	9.3428	9.35079	9.48331	9.52787
3	1	40	0	2	2	3	22.8333	1	15.7333	1	15.7333	1	22.8333	0	1	1	1	GSM816342	8.35747	9.12798	8.94327	9.9823
3	1	160	20	2	1	2	23.2333	1	16.4	1	16.4	1	23.2333	0	0	1	1	GSM816300	9.79416	10.4637	9.40351	10.8021
3	0	0	0	4	2	4	18.6	1	16.5	1	16.5	1	18.6	0	1	1	1	GSM816133	10.1052	10.558	9.90989	10.5946
3	1	320	40	3	2	3	28.7333	1	16.7667	1	16.7667	1	28.7333	0	1	1	1	GSM816328	8.09564	8.86208	8.29881	8.74667
3	1	320	20	3	1	3	29.3333	1	18.1333	1	18.1333	1	29.3333	0	1	1	1	GSM816317	8.41392	8.8204	9.75309	8.45583
3	1	40	0	4	1	4	21.6333	1	18.7	1	18.7	1	21.6333	0	0	0	1	GSM816145	9.80656	10.2372	10.0415	9.91711
3	1	320	40	1	2	3	41.4333	1	19.3667	1	19.3667	1	41.4333	0	1	1	1	GSM816165	10.0033	10.1302	9.87565	10.5696
3	1	640	80	4	1	4	62.9	1	19.4333	1	19.4333	1	62.9	0	1	1	1	GSM816094	10.2182	9.75309	8.91663	10.923
3	1	160	20	3	1	3	48.0333	1	19.8667	1	19.8667	1	48.0333	0	0	0	1	GSM816308	8.39198	8.48539	8.51117	9.60704
3	1	640	40	4	2	4	21.9667	1	21.0333	1	21.0333	1	21.9667	0	0	0	1	GSM816062	9.41169	8.44198	8.72158	11.2538
3	1	160	10	3	0	3	56.2667	1	22.4333	1	22.4333	1	56.2667	0	1	1	0	GSM816209	9.46642	9.32411	9.05317	10.558
3	1	80	10	2	0	2	23.6667	1	12.8333	1	23.6667	0	12.8333	1	0	0	1	GSM816138	9.70747	9.80656	9.92402	10.1469
3	1	80	0	2	1	2	23.7667	0	20.7667	1	23.7667	0	20.7667	1	0	1	0	GSM816203	11.0013	11.5099	11.0632	11.7896
3	1	640	160	4	3	4	23.8333	1	9.43333	1	23.8333	0	9.43333	1	0	0	1	GSM816121	9.19887	9.30592	8.80675	9.14887
2	1	320	40	2	3	4	27.8333	1	24.2	1	24.2	1	27.8333	0	0	0	1	GSM816286	8.70049	8.93185	7.79121	9.35466
3	1	320	80	2	2	3	60	0	24.2	1	24.2	1	60	0	0	0	1	GSM816288	9.56471	9.41169	8.99857	10.0975
3	1	40	0	4	1	4	24.3667	0	24.3667	0	24.3667	0	24.3667	0	0	1	1	GSM816251	8.92297	9.74712	9.07828	9.81286
3	1	640	80	4	2	4	32.5333	1	25.1	1	25.1	1	32.5333	0	1	0	0	GSM816043	9.44572	9.35876	9.25961	10.2275
3	1	160	10	3	1	3	29.0333	1	25.5667	1	25.5667	1	25.5667	1	0	0	1	GSM816096	9.90989	10.3609	10.0112	10.4972
3	1	40	0	1	1	2	26.8	0	26.8	0	26.8	0	26.8	0	0	0	1	GSM816073	9.72417	9.38358	9.62708	10.4859
3	1	160	10	4	1	4	27.3667	0	27.3667	0	27.3667	0	27.3667	0	1	0	0	GSM816229	9.03957	10.6453	9.69069	9.67383
3	1	1280	160	4	3	4	29.2333	1	6.26667	1	29.2333	0	6.26667	1	0	1	1	GSM816345	8.82625	10.6579	9.11284	11.3484
3	1	1280	160	4	2	4	40.3667	1	29.3333	1	29.3333	1	40.3667	0	1	0	1	GSM816285	8.51605	8.72339	8.5919	8.97834
2	1	160	40	4	1	4	37.7	1	29.9667	1	29.9667	1	37.7	0	1	1	1	GSM816305	8.32013	8.95037	8.25371	9.19887
3	1	640	160	4	1	4	47.7333	1	30.0667	1	30.0667	1	47.7333	0	0	0	1	GSM816077	10.2644	10.4859	9.32411	11.8619
3	1	160	20	1	1	2	30.3667	0	30.3667	0	30.3667	0	30.3667	0	0	1	1	GSM816143	10.6317	10.8164	11.0467	11.2906
3	1	160	0	3	1	3	31.5333	1	18.6333	1	31.5333	0	18.6333	1	0	1	1	GSM816235	8.59021	9.08667	8.65612	9.40351
3	1	160	10	4	2	4	55.3333	1	14	1	33.1333	1	14	1	0	0	1	GSM816193	10.199	10.8021	10.0891	11.5549
3	1	160	20	4	1	4	46.6333	1	33.8667	1	33.8667	1	46.6333	0	0	0	1	GSM816212	8.63273	8.94793	8.43514	9.03424
3	1	1280	320	3	2	3	35.5	0	35.5	0	35.5	0	35.5	0	1	0	0	GSM816053	10.199	10.0187	8.83788	10.558
3	1	320	40	3	3	4	36.2333	1	20.5333	1	36.2333	0	20.5333	1	0	0	1	GSM816104	10.5946	10.4529	11.0467	11.3484
3	1	1280	80	4	1	4	40.9	1	36.9	1	36.9	1	40.9	0	1	0	1	GSM816172	10.034	10.6838	9.72417	9.29513
3	1	640	160	4	1	4	39.6	0	39.6	0	39.6	0	39.6	0	0	0	1	GSM816243	8.46078	8.59021	8.35927	9.28096
3	1	160	10	4	1	4	40.1	1	16.0667	1	40.1	0	16.0667	1	0	0	1	GSM816105	7.59895	8.6762	8.10878	9.73036
3	1	160	10	1	2	3	49.1	1	21.8333	1	41.6667	1	21.8333	1	0	0	1	GSM816100	9.78828	9.08123	8.84764	10.1217
3	1	160	10	3	1	3	52.9333	1	23.3667	1	42.1667	1	23.3667	1	0	1	1	GSM816199	10.7363	11.2726	10.8164	11.4462
3	1	320	40	1	1	2	45.5	0	45.5	0	45.5	0	45.5	0	1	1	1	GSM816339	9.01913	9.74165	8.5852	10.6579
3	1	160	0	2	2	3	48.2333	1	31.2	1	48.2333	0	31.2	1	0	1	1	GSM816140	9.30247	9.46265	9.10071	10.7095
3	1	320	10	1	1	2	48.8667	0	36.3667	1	48.8667	0	36.3667	1	1	0	1	GSM816267	8.77924	8.83965	8.39387	9.01099
3	1	320	10	4	0	4	51.8333	1	39.0333	1	50.5	1	39.0333	1	0	1	1	GSM816084	9.47441	8.46419	10.3702	11.6478
3	1	40	0	2	1	2	51.0333	0	51.0333	0	51.0333	0	51.0333	0	1	1	1	GSM816325	8.75198	9.09802	8.2415	9.23269
3	1	640	160	4	1	4	52.6	0	52.6	0	52.6	0	52.6	0	1	1	1	GSM816045	8.78121	9.12798	9.06095	10.7627
3	1	320	40	4	2	4	67.9333	1	53.9333	1	53.9333	1	67.9333	0	0	0	1	GSM816136	9.53248	9.3715	9.73582	9.81913
3	1	640	80	3	2	3	54.3667	0	18.2	1	54.3667	0	18.2	1	0	1	1	GSM816334	8.39004	9.07516	8.40321	10.1722
3	1	320	40	2	3	4	65	1	54.5667	1	54.5667	1	65	0	0	1	1	GSM816297	8.96442	9.26316	8.92103	9.21869
3	1	320	40	2	1	2	63.6333	1	26.7667	1	54.8667	1	26.7667	1	0	1	1	GSM816313	8.6714	8.95037	8.20736	9.2394
3	1	320	40	3	1	3	64.4	1	55.2	1	55.2	1	64.4	0	1	1	1	GSM816310	8.65298	8.67295	9.10379	9.35876
3	1	320	0	4	1	4	55.8333	1	11.1667	1	55.8333	0	11.1667	1	0	0	0	GSM816087	8.61653	8.85991	8.59362	10.5083
3	1	160	10	2	1	2	57.9	1	51.4333	1	57.9	0	51.4333	1	0	1	0	GSM816070	9.40754	8.95985	8.81084	9.93884
3	1	80	0	2	1	2	58.0667	1	46.2	1	58.0667	0	46.2	1	0	1	1	GSM816247	9.83141	10.6704	9.9314	11.0013
3	1	160	10	3	3	4	60.7	0	59.9	1	59.9	1	60.7	0	0	1	0	GSM816226	8.4951	9.07828	9.66853	10.1722
3	1	160	20	4	1	4	60	0	60	0	60	0	60	0	1	0	1	GSM816322	9.07828	9.6793	8.34212	10.9689
3	1	640	80	3	2	3	60.0333	0	60.0333	0	60.0333	0	60.0333	0	1	0	1	GSM816237	8.99369	9.20508	8.37098	9.08388
3	1	80	0	2	1	2	60.0667	0	60.0667	0	60.0667	0	60.0667	0	1	1	1	GSM816271	8.31388	9.15465	10.0563	9.12238
3	1	320	10	2	2	3	60.1	0	60.1	0	60.1	0	60.1	0	1	1	1	GSM816320	9.18922	10.0891	8.98857	10.4972
3	1	640	40	2	1	2	60.1333	0	60.1333	0	60.1333	0	60.1333	0	1	1	1	GSM816333	8.44711	9.5509	8.80864	10.907
3	1	640	80	3	3	4	60.1667	0	60.1667	0	60.1667	0	60.1667	0	1	1	1	GSM816098	9.53248	11.4075	10.0563	11.5549
3	1	160	10	3	1	3	60.2667	0	60.2667	0	60.2667	0	60.2667	0	1	0	0	GSM816303	11.4679	9.74712	10.1722	10.0725
3	1	640	160	3	1	3	60.2667	0	60.2667	0	60.2667	0	60.2667	0	1	1	1	GSM816086	10.0492	10.8164	10.6056	11.3878
3	1	320	10	2	0	2	60.2667	0	60.2667	0	60.2667	0	60.2667	0	0	0	1	GSM816208	8.77743	8.95298	8.55154	9.93884
3	1	320	40	3	1	3	60.3333	0	60.3333	0	60.3333	0	60.3333	0	0	1	1	GSM816323	8.87642	9.64751	8.10878	11.0632
2	1	80	0	4	1	4	60.3667	0	45.5	1	60.3667	0	45.5	1	1	0	1	GSM816039	8.80118	9.38358	9.10974	9.69642
3	1	640	80	3	3	4	60.3667	0	60.3667	0	60.3667	0	60.3667	0	1	0	1	GSM816344	9.78828	10.7363	9.50071	10.2839
3	1	320	40	4	1	4	60.4	0	24	1	60.4	0	24	1	1	0	1	GSM816061	9.02427	9.25961	9.33546	9.44572
3	1	320	40	1	1	2	60.4	0	60.4	0	60.4	0	60.4	0	1	1	1	GSM816304	8.40509	9.15763	8.14621	8.95747
3	1	320	80	4	1	4	60.4333	0	60.4333	0	60.4333	0	60.4333	0	1	1	0	GSM816196	8.81463	9.23269	8.83607	9.4875
3	1	10	0	2	1	2	60.4333	0	60.4333	0	60.4333	0	60.4333	0	0	0	1	GSM816192	9.15185	11.1658	10.1552	10.0891
3	1	40	0	2	1	2	60.4333	0	60.4333	0	60.4333	0	60.4333	0	1	0	1	GSM816246	9.49231	10.1134	9.56471	10.7494
3	1	320	20	2	0	2	60.4333	0	60.4333	0	60.4333	0	60.4333	0	0	0	1	GSM816341	9.29158	11.0319	9.20872	10.2085
3	1	320	80	3	1	3	60.5	0	32.8	1	60.5	0	32.8	1	1	0	0	GSM816287	9.44129	9.58356	8.87217	9.4375
3	1	320	40	1	2	3	60.5667	0	60.5667	0	60.5667	0	60.5667	0	0	1	1	GSM816173	10.2839	11.1658	10.2644	11.217
3	1	1280	80	2	0	2	60.5667	1	2.36667	1	60.5667	0	2.36667	1	0	0	1	GSM816279	10.0187	10.0033	9.53728	11.5322
3	0	0	0	2	1	2	60.5667	0	60.5667	0	60.5667	0	60.5667	0	1	1	1	GSM816347	8.73062	9.49619	8.81084	9.30592
3	1	40	0	1	3	4	60.6	0	60.6	0	60.6	0	60.6	0	1	0	1	GSM816254	8.47905	8.49835	8.41548	8.79945
3	1	320	40	4	1	4	60.7	0	60.7	0	60.7	0	60.7	0	0	0	0	GSM816314	8.29664	8.3975	8.26967	9.21527
3	1	320	20	3	2	3	60.7333	0	60.7333	0	60.7333	0	60.7333	0	0	0	1	GSM816119	8.96903	9.30592	9.38358	9.35876
3	1	320	20	1	3	4	60.8	0	60.8	0	60.8	0	60.8	0	0	0	1	GSM816298	8.09119	8.91908	8.25141	8.6762
3	1	160	10	2	0	2	60.8	0	60.8	0	60.8	0	60.8	0	0	1	1	GSM816346	8.97591	9.80656	8.13539	11.4265
3	1	160	40	4	2	4	60.8333	0	60.8333	0	60.8333	0	60.8333	0	1	0	1	GSM816265	8.84967	8.29881	8.37313	8.82232
3	1	160	20	2	1	2	60.8667	0	60.8667	0	60.8667	0	60.8667	0	0	0	1	GSM816321	8.59021	9.57887	9.69642	9.42391
3	1	160	10	3	1	3	60.9	0	60.9	0	60.9	0	60.9	0	0	0	1	GSM816327	8.29881	9.51413	8.23885	8.86208
3	1	320	10	2	2	3	60.9	0	60.9	0	60.9	0	60.9	0	0	1	1	GSM816348	9.39944	8.98077	8.67967	8.99117
3	1	160	10	1	2	3	60.9667	0	60.9667	0	60.9667	0	60.9667	0	1	1	1	GSM816260	8.84579	9.19564	8.70601	9.2703
3	1	160	10	1	0	1	60.9667	0	60.9667	0	60.9667	0	60.9667	0	0	0	1	GSM816262	9.08388	9.51896	8.67797	9.10674
2	1	160	40	1	1	2	61	0	61	0	61	0	61	0	0	0	1	GSM816281	8.38633	8.7902	8.36705	10.1302
3	1	10	0	4	1	4	61.0667	0	61.0667	0	61.0667	0	61.0667	0	1	1	1	GSM816337	10.2925	9.52787	10.3119	9.49619
3	1	160	0	1	1	2	61.1667	0	61.1667	0	61.1667	0	61.1667	0	1	0	1	GSM816277	9.05023	9.85046	8.43326	9.9314
3	1	1280	320	3	3	4	61.2333	0	61.2333	0	61.2333	0	61.2333	0	0	1	1	GSM816335	8.82232	10.8021	10.0975	10.7494
3	1	640	20	3	1	3	61.2667	0	61.2667	0	61.2667	0	61.2667	0	1	0	1	GSM816273	9.68524	7.97997	8.81463	10.5821
3	1	640	80	4	2	4	61.3333	0	61.3333	0	61.3333	0	61.3333	0	0	0	0	GSM816276	9.10379	9.52354	8.52104	9.52787
3	1	320	20	1	1	2	61.3667	0	61.3667	0	61.3667	0	61.3667	0	1	1	1	GSM816329	10.199	9.80656	10.3805	11.0632
3	1	160	10	4	1	4	61.4	0	61.4	0	61.4	0	61.4	0	1	1	1	GSM816236	8.70749	8.93882	8.56209	9.27751
3	1	160	40	2	2	3	61.4667	0	26.3667	1	61.4667	0	26.3667	1	0	0	1	GSM816338	8.83788	8.72691	8.18465	9.58356
3	1	40	0	2	1	2	61.6	0	61.6	0	61.6	0	61.6	0	0	0	1	GSM816293	8.29881	9.19564	8.3401	9.33182
3	1	320	10	3	2	3	61.6333	0	61.6333	0	61.6333	0	61.6333	0	0	1	1	GSM816090	10.3505	11.0467	10.5323	12.4593
3	1	160	0	3	1	3	61.6333	0	61.6333	0	61.6333	0	61.6333	0	0	1	1	GSM816269	9.74165	8.73399	8.64788	11.0013
3	1	640	80	4	0	4	61.6333	0	61.6333	0	61.6333	0	61.6333	0	1	0	1	GSM816336	8.76803	9.10674	10.2459	8.78121
3	1	1280	80	4	1	4	61.6667	0	61.6667	0	61.6667	0	61.6667	0	1	0	0	GSM816240	8.67295	8.5032	8.09564	8.90777
3	1	1280	160	1	1	2	61.7333	0	61.7333	0	61.7333	0	61.7333	0	1	1	0	GSM816319	9.2703	9.81913	8.95298	10.2644
3	1	320	40	4	1	4	61.8	0	61.8	0	61.8	0	61.8	0	1	1	0	GSM816221	9.15465	9.4375	9.35079	9.57887
3	1	640	80	3	1	3	61.8667	0	61.8667	0	61.8667	0	61.8667	0	0	0	1	GSM816349	8.59668	9.48331	8.25371	9.59756
3	1	80	0	4	1	4	61.9	0	61.9	0	61.9	0	61.9	0	0	1	1	GSM816294	8.06781	8.60348	8.03972	8.95524
3	1	40	0	4	1	4	61.9	0	61.9	0	61.9	0	61.9	0	0	1	1	GSM816295	8.87642	9.43289	8.68664	10.2182
2	1	160	20	1	1	2	61.9333	0	61.9333	0	61.9333	0	61.9333	0	0	0	1	GSM816216	9.70747	10.878	9.98923	11.5788
3	0	0	0	1	1	2	62.0333	0	62.0333	0	62.0333	0	62.0333	0	0	1	1	GSM816241	8.53822	10.274	9.89681	10.878
3	1	640	80	4	0	4	62.1	0	62.1	0	62.1	0	62.1	0	1	0	1	GSM816324	10.026	9.83141	9.90989	9.07232
3	1	160	10	2	0	2	62.4	0	62.4	0	62.4	0	62.4	0	1	1	1	GSM816332	8.85585	9.68524	10.7757	11.2012
3	1	40	0	1	1	2	62.4333	0	62.4333	0	62.4333	0	62.4333	0	1	0	1	GSM816292	8.44016	9.51413	8.81651	9.59331
3	0	0	0	2	0	2	62.5	0	62.5	0	62.5	0	62.5	0	0	1	1	GSM816312	10.8333	9.62708	9.16691	10.5946
3	1	320	40	4	3	4	62.5	0	62.5	0	62.5	0	62.5	0	1	0	1	GSM816331	8.79389	8.62804	8.58381	8.69343
3	1	80	10	2	0	2	62.5333	0	62.5333	0	62.5333	0	62.5333	0	1	1	1	GSM816218	10.5445	11.0319	9.96833	12.0177
3	1	160	10	1	0	1	62.6667	0	62.6667	0	62.6667	0	62.6667	0	0	1	0	GSM816318	8.60186	8.6068	9.71877	9.37568
3	1	1280	320	3	2	3	62.73	0	62.73	0	62.73	0	62.73	0	0	1	1	GSM816340	8.53822	9.21869	9.64751	9.51413
3	1	160	10	4	1	4	62.9333	0	62.9333	0	62.9333	0	62.9333	0	1	0	0	GSM816316	9.53728	8.52104	8.47734	8.99369
3	1	20	0	2	0	2	62.9667	0	62.9667	0	62.9667	0	62.9667	0	0	0	1	GSM816198	10.4425	11.0013	10.2372	11.5788
3	1	160	20	4	0	4	63.1667	0	63.1667	0	63.1667	0	63.1667	0	0	0	0	GSM816315	8.00357	8.78476	8.24646	8.32216
3	1	320	20	1	2	3	63.2333	0	63.2333	0	63.2333	0	63.2333	0	0	0	1	GSM816081	9.30592	10.0644	10.6317	10.7757
3	1	640	20	4	2	4	63.5333	0	63.5333	0	63.5333	0	63.5333	0	1	1	1	GSM816266	8.7431	8.9367	8.41548	9.13703
3	1	640	40	2	2	3	63.6	0	25.3	1	63.6	0	25.3	1	0	1	1	GSM816074	10.7892	9.08667	11.1321	12.202
3	1	1280	320	3	3	4	63.8	0	63.8	0	63.8	0	63.8	0	1	0	1	GSM816182	9.56003	11.2906	8.58669	10.7234
3	1	1280	160	3	2	3	63.8667	0	63.8667	0	63.8667	0	63.8667	0	0	1	1	GSM816299	8.30969	8.82232	8.6645	8.39387
3	1	320	20	4	1	4	63.9333	0	63.9333	0	63.9333	0	63.9333	0	1	0	1	GSM816264	9.69642	10.4637	9.89006	9.80656
3	1	320	20	2	3	4	63.9667	0	63.9667	0	63.9667	0	63.9667	0	0	0	0	GSM816222	10.0492	9.87565	9.13411	10.1388
3	1	320	20	2	1	2	63.9667	0	63.9667	0	63.9667	0	63.9667	0	0	1	1	GSM816206	9.31663	9.5509	10.3313	10.4118
3	1	320	10	1	1	2	64	0	64	0	64	0	64	0	0	1	1	GSM816306	8.34808	9.0584	8.15301	8.82428
3	1	320	80	2	3	4	64.0333	0	64.0333	0	64.0333	0	64.0333	0	0	1	1	GSM816309	8.15663	10.4637	9.9823	10.5696
3	1	640	80	1	1	2	64.1333	0	64.1333	0	64.1333	0	64.1333	0	0	0	1	GSM816202	9.32411	9.63693	9.25961	9.84427
3	1	320	20	1	2	3	64.1667	0	64.1667	0	64.1667	0	64.1667	0	0	1	1	GSM816245	8.41216	8.01035	8.29476	8.75198
3	0	0	0	2	1	2	64.4	0	64.4	0	64.4	0	64.4	0	1	1	1	GSM816296	9.01354	9.45008	8.80497	10.4118
3	1	1280	80	1	1	2	64.4333	0	64.4333	0	64.4333	0	64.4333	0	0	0	1	GSM816261	9.30592	10.1217	8.77924	9.57405
3	1	160	10	2	2	3	64.6	0	64.6	0	64.6	0	64.6	0	0	1	1	GSM816225	9.20183	9.37568	8.68134	10.4637
3	1	40	0	3	0	3	64.6333	0	64.6333	0	64.6333	0	64.6333	0	1	1	1	GSM816238	9.66853	10.3905	10.3015	11.2012
3	1	320	80	3	0	3	70.6667	1	52.4667	1	64.6667	1	52.4667	1	1	1	0	GSM816113	9.06095	9.29865	9.35876	9.45414
3	1	640	80	2	3	4	64.7	0	64.7	0	64.7	0	64.7	0	1	1	1	GSM816301	8.40141	10.8486	10.5323	10.6056
3	1	640	80	3	2	3	64.8	0	64.8	0	64.8	0	64.8	0	0	1	1	GSM816289	8.22878	8.36705	8.19626	8.98335
3	1	160	0	3	1	3	64.9	0	64.9	0	64.9	0	64.9	0	1	1	1	GSM816156	9.89006	10.7757	10.199	10.4327
3	1	1280	80	3	2	3	64.9333	0	64.9333	0	64.9333	0	64.9333	0	0	0	1	GSM816291	9.14305	9.63693	9.00364	10.5203
3	1	160	0	3	1	3	65.1	0	65.1	0	65.1	0	65.1	0	1	0	1	GSM816282	9.54644	10.4118	10.1552	10.985
3	1	160	10	2	1	2	65.2333	0	65.2333	0	65.2333	0	65.2333	0	0	1	1	GSM816250	10.0644	8.7921	10.1302	10.7494
3	1	320	10	2	3	4	65.2333	0	65.2333	0	65.2333	0	65.2333	0	1	0	1	GSM816283	9.40351	10.2372	8.95985	10.8021
3	1	10	0	4	0	4	65.33	0	65.33	0	65.33	0	65.33	0	1	0	0	GSM816307	8.20488	8.56544	8.01035	8.9296
3	1	640	160	4	2	4	65.37	0	65.37	0	65.37	0	65.37	0	1	1	1	GSM816311	9.02164	9.89006	9.6118	10.2839
3	1	80	0	4	0	4	65.4	0	65.4	0	65.4	0	65.4	0	1	0	1	GSM816280	8.71618	8.87848	8.28124	9.29513
3	1	80	10	3	2	3	65.4667	0	65.4667	0	65.4667	0	65.4667	0	0	0	1	GSM816255	8.29664	8.37313	8.3975	8.86791
3	1	320	10	3	1	3	65.5333	0	65.5333	0	65.5333	0	65.5333	0	0	0	1	GSM816207	8.78846	9.51896	9.34651	9.61617
3	1	20	0	1	1	2	65.6	0	65.6	0	65.6	0	65.6	0	0	0	1	GSM816204	11.1142	11.7656	10.3609	12.5209
3	1	320	10	3	1	3	65.8333	0	65.8333	0	65.8333	0	65.8333	0	0	0	1	GSM816147	8.88684	10.1901	8.48238	11.0319
3	1	160	10	2	1	2	66	0	66	0	66	0	66	0	0	1	1	GSM816166	9.69642	10.2182	9.56003	10.4859
3	1	320	80	1	0	1	66	0	66	0	66	0	66	0	1	1	1	GSM816290	8.3266	8.45907	8.42633	9.14592
3	1	320	20	2	0	2	66.0667	0	66.0667	0	66.0667	0	66.0667	0	0	1	1	GSM816233	8.46078	8.98857	8.38262	10.0563
3	1	160	0	3	1	3	66.3	0	66.3	0	66.3	0	66.3	0	1	0	1	GSM816248	9.11927	10.034	8.91908	10.1469
3	1	320	10	2	1	2	66.4	0	66.4	0	66.4	0	66.4	0	1	1	1	GSM816252	8.39004	8.60996	8.36115	9.35079
3	1	80	0	2	0	2	66.6667	0	66.6667	0	66.6667	0	66.6667	0	1	0	1	GSM816217	9.83788	9.75309	9.37568	10.9689
3	1	80	10	2	2	3	66.7	0	66.7	0	66.7	0	66.7	0	1	0	1	GSM816259	8.33204	9.51896	8.76441	10.034
3	1	160	10	1	0	1	66.9667	0	66.9667	0	66.9667	0	66.9667	0	0	0	1	GSM816181	9.56003	10.4425	9.28435	11.3878
3	1	160	10	4	1	4	67.1667	0	67.1667	0	67.1667	0	67.1667	0	1	0	1	GSM816171	10.3408	10.8486	10.3215	11.3689
3	1	160	40	3	2	3	67.3	0	67.3	0	67.3	0	67.3	0	1	0	0	GSM816131	10.0112	10.2085	9.97483	10.1134
3	1	80	0	1	0	1	67.4667	0	67.4667	0	67.4667	0	67.4667	0	1	0	1	GSM816258	8.45747	8.73938	8.57535	9.63197
3	1	1280	40	2	1	2	67.5667	0	67.5667	0	67.5667	0	67.5667	0	0	0	1	GSM816151	9.14887	9.68524	9.06963	10.5946
3	1	320	20	1	1	2	67.8	0	67.8	0	67.8	0	67.8	0	1	0	1	GSM816223	8.37683	8.92297	8.55847	9.09507
3	1	40	0	2	1	2	67.9667	0	67.9667	0	67.9667	0	67.9667	0	0	1	1	GSM816215	9.62708	10.5821	9.74165	10.6579
3	1	320	10	2	1	2	68	0	68	0	68	0	68	0	0	1	0	GSM816159	9.59331	10.4217	9.49619	10.3119
3	1	320	10	4	1	4	68.1	0	68.1	0	68.1	0	68.1	0	0	0	1	GSM816249	9.4375	9.33546	9.20872	9.85669
3	1	320	40	3	2	3	68.2333	0	68.2333	0	68.2333	0	68.2333	0	0	1	1	GSM816157	9.95388	10.4859	10.475	10.6453
3	1	640	20	2	2	3	68.3333	0	68.3333	0	68.3333	0	68.3333	0	0	1	1	GSM816220	9.84427	10.2459	9.70747	9.63197
3	1	320	0	3	1	3	68.3667	0	68.3667	0	68.3667	0	68.3667	0	1	1	1	GSM816153	9.42006	9.83141	9.57887	9.71286
3	1	320	40	3	2	3	68.5333	0	68.5333	0	68.5333	0	68.5333	0	1	0	0	GSM816219	9.47441	9.29513	9.19564	10.2372
3	1	320	40	1	1	2	68.8	0	68.8	0	68.8	0	68.8	0	0	0	1	GSM816169	10.0563	10.7494	9.96833	11.2343
3	1	40	0	2	0	2	68.9333	0	68.9333	0	68.9333	0	68.9333	0	0	1	1	GSM816231	8.60015	9.30592	8.84579	9.74165
3	1	160	20	1	1	2	69.1333	0	69.1333	0	69.1333	0	69.1333	0	1	0	1	GSM816120	9.27751	9.33546	9.40351	9.52787
3	1	320	80	4	1	4	69.1333	0	69.1333	0	69.1333	0	69.1333	0	1	0	1	GSM816197	10.4859	10.9393	9.98923	11.5322
3	1	320	10	1	3	4	69.1333	0	18.9333	1	69.1333	0	18.9333	1	1	0	1	GSM816234	9.62708	10.0563	9.17632	9.56003
3	1	160	0	2	1	2	69.2333	0	69.2333	0	69.2333	0	69.2333	0	0	0	1	GSM816146	10.8486	11.6478	11.1493	12.3398
3	1	640	80	4	2	4	69.2667	0	65	1	69.2667	0	65	1	0	0	1	GSM816066	8.68478	9.33546	9.13411	10.034
3	1	160	10	2	1	2	69.4333	0	26.2333	1	69.4333	0	26.2333	1	0	1	1	GSM816227	8.22109	9.10379	8.249	9.29158
3	1	10	0	2	3	4	69.4667	0	69.4667	0	69.4667	0	69.4667	0	0	0	1	GSM816210	10.2551	10.6579	10.5203	11.2906
1	1	640	160	2	2	3	69.7333	0	69.7333	0	69.7333	0	69.7333	0	0	1	1	GSM816130	9.75309	9.75855	9.91711	9.92402
3	1	160	0	4	0	4	69.8	0	69.8	0	69.8	0	69.8	0	1	1	0	GSM816239	9.37568	9.59331	9.10071	9.22518
3	1	1280	320	4	3	4	69.8667	0	69.8667	0	69.8667	0	69.8667	0	1	0	1	GSM816176	9.25961	9.3128	9.46642	9.33182
3	1	320	20	4	2	4	69.9	0	69.9	0	69.9	0	69.9	0	1	1	0	GSM816126	9.27751	9.60212	9.56471	9.89681
3	1	320	40	2	0	2	69.9333	0	69.9333	0	69.9333	0	69.9333	0	1	1	1	GSM816228	8.89096	9.65262	9.10974	9.94591
3	1	320	80	2	1	2	70	0	70	0	70	0	70	0	1	1	1	GSM816123	9.41565	9.72417	9.90989	10.3015
3	1	640	160	1	1	2	70	0	70	0	70	0	70	0	0	1	1	GSM816127	9.96833	10.5946	10.4425	11.0959
3	1	1280	320	1	1	2	70.1667	0	70.1667	0	70.1667	0	70.1667	0	0	1	1	GSM816205	8.90777	9.51896	9.50071	9.33927
3	1	40	0	4	1	4	70.4333	0	70.4333	0	70.4333	0	70.4333	0	1	1	1	GSM816232	8.20488	8.92518	8.63612	9.96116
3	1	320	40	4	0	4	70.5333	0	70.5333	0	70.5333	0	70.5333	0	1	1	1	GSM816201	10.4425	11.0013	10.2372	11.5549
3	1	640	80	1	2	3	70.5667	0	70.5667	0	70.5667	0	70.5667	0	0	0	1	GSM816110	10.2372	10.8928	9.45414	9.73582
3	0	0	0	3	1	3	70.8	0	70.8	0	70.8	0	70.8	0	0	0	1	GSM816189	9.25255	10.026	9.14592	9.80049
3	1	20	0	2	2	3	71.3	0	71.3	0	71.3	0	71.3	0	1	0	1	GSM816132	10.3015	10.923	10.6579	10.985
3	1	640	10	2	0	2	71.5	0	71.5	0	71.5	0	71.5	0	0	0	1	GSM816111	10.0644	10.6317	10.5946	11.8373
3	1	320	40	2	0	2	71.5	0	71.5	0	71.5	0	71.5	0	0	0	1	GSM816122	9.33182	9.73036	10.1469	9.78226
3	1	300	10	3	0	3	71.6667	0	71.6667	0	71.6667	0	71.6667	0	1	0	1	GSM816160	9.59331	10.923	9.88302	12.1476
3	1	160	0	4	3	4	71.7	0	71.7	0	71.7	0	71.7	0	0	0	1	GSM816139	10.4529	11.3689	11.5322	12.1746
3	1	320	10	1	1	2	71.9667	0	71.9667	0	71.9667	0	71.9667	0	1	0	1	GSM816137	9.59756	10.6056	10.2644	10.0644
3	1	80	0	2	2	3	72.2	0	72.2	0	72.2	0	72.2	0	0	0	1	GSM816211	10.0975	10.6704	9.76383	11.2538
3	1	320	80	3	1	3	72.2667	0	72.2667	0	72.2667	0	72.2667	0	1	0	1	GSM816124	9.18611	9.61617	9.5509	9.54644
3	1	160	20	2	1	2	72.3333	0	72.3333	0	72.3333	0	72.3333	0	1	0	1	GSM816200	10.923	11.5099	11.0165	11.5549
3	1	80	20	3	2	3	72.6	0	72.6	0	72.6	0	72.6	0	1	0	0	GSM816162	9.29158	10.1469	9.56945	9.77002
2	1	160	20	2	1	2	72.8667	0	72.8667	0	72.8667	0	72.8667	0	0	0	1	GSM816194	10.4118	10.7757	10.0033	11.5549
3	1	320	40	1	2	3	73	0	73	0	73	0	73	0	1	0	1	GSM816191	9.59331	9.6793	10.3805	10.3609
3	1	640	20	2	0	2	73.0333	0	73.0333	0	73.0333	0	73.0333	0	1	1	1	GSM816188	9.45414	9.64751	9.4284	9.95388
3	1	40	0	1	0	1	73.5	0	73.5	0	73.5	0	73.5	0	0	0	0	GSM816190	9.3128	10.034	8.73577	11.3285
3	1	640	160	2	2	3	73.7	0	73.7	0	73.7	0	73.7	0	0	0	1	GSM816178	9.56003	9.73036	9.89681	10.1388
3	1	160	10	1	3	4	73.7333	0	73.7333	0	73.7333	0	73.7333	0	0	0	1	GSM816129	10.2085	11.5322	11.2538	12.311
3	1	640	160	2	2	3	74.1	0	74.1	0	74.1	0	74.1	0	0	0	1	GSM816179	10.3215	10.985	9.93884	11.5099
3	1	320	20	4	1	4	74.1333	0	74.1333	0	74.1333	0	74.1333	0	0	1	1	GSM816135	8.45419	9.15465	9.75309	9.15185
3	1	640	80	3	2	3	74.1667	0	74.1667	0	74.1667	0	74.1667	0	0	0	1	GSM816167	9.67383	10.1722	9.25961	9.84427
3	1	40	0	3	0	3	74.3667	0	74.3667	0	74.3667	0	74.3667	0	0	0	1	GSM816177	9.24634	9.58825	9.50545	9.93884
3	1	10	0	3	2	3	74.4667	0	74.4667	0	74.4667	0	74.4667	0	0	1	1	GSM816109	9.90989	9.87565	9.9823	10.3805
3	1	160	20	3	0	3	74.9333	0	74.9333	0	74.9333	0	74.9333	0	0	1	1	GSM816118	8.98857	9.2394	9.39567	9.54167
3	1	40	0	2	1	2	75.1333	0	75.1333	0	75.1333	0	75.1333	0	0	0	1	GSM816106	10.0112	10.3313	10.3702	10.3805
3	1	320	20	1	1	2	75.1333	0	75.1333	0	75.1333	0	75.1333	0	1	1	1	GSM816128	10.696	11.2726	11.696	12.1746
3	1	160	20	3	1	3	75.2333	0	75.2333	0	75.2333	0	75.2333	0	0	1	1	GSM816170	10.3313	10.8486	10.3119	11.3484
3	1	80	0	1	2	3	75.3667	0	75.3667	0	75.3667	0	75.3667	0	1	0	1	GSM816125	9.00364	10.2372	9.6118	9.4284
3	1	640	80	2	2	3	75.3667	0	35.9667	1	75.3667	0	35.9667	1	1	1	1	GSM816174	10.3313	11.1836	10.3905	11.0319
1	1	160	10	3	1	3	75.7667	0	75.7667	0	75.7667	0	75.7667	0	0	0	1	GSM816095	10.7234	11.4265	10.7363	12.5554
3	1	640	40	2	1	2	75.8	0	75.8	0	75.8	0	75.8	0	1	1	1	GSM816161	9.77582	10.3702	9.78828	9.93884
3	1	1280	80	4	1	4	76.2333	1	73.5667	1	76.2333	0	73.5667	1	0	1	1	GSM816056	9.04782	9.18922	9.95388	9.1607
3	1	160	10	4	1	4	76.3	0	76.3	0	76.3	0	76.3	0	1	1	1	GSM816154	9.73582	10.3609	10.1814	10.3805
3	1	1280	160	4	3	4	76.3	0	76.3	0	76.3	0	76.3	0	0	1	1	GSM816158	9.65771	10.6838	9.9314	10.3408
3	1	160	40	2	0	2	76.3667	0	52.3667	1	76.3667	0	52.3667	1	0	1	1	GSM816115	9.76383	10.2085	9.37568	10.2372
3	1	160	0	2	3	4	76.3667	0	76.3667	0	76.3667	0	76.3667	0	1	0	1	GSM816152	8.88684	10.1388	10.1814	11.6245
3	1	640	160	4	1	4	76.5	0	76.5	0	76.5	0	76.5	0	1	1	0	GSM816103	9.90989	10.0563	10.2372	9.96116
3	1	160	40	1	2	3	76.5333	0	76.5333	0	76.5333	0	76.5333	0	1	0	1	GSM816050	10.475	10.923	10.6056	11.217
3	1	1280	320	2	2	3	76.8667	0	76.8667	0	76.8667	0	76.8667	0	0	1	1	GSM816144	9.88302	10.2275	10.475	10.2182
3	1	1280	160	3	1	3	77.2	0	77.2	0	77.2	0	77.2	0	0	1	1	GSM816149	10.0112	10.9393	10.3313	11.3484
3	1	640	80	3	3	4	77.2667	0	77.2667	0	77.2667	0	77.2667	0	0	1	1	GSM816142	10.2925	10.8643	10.6176	11.4075
3	1	320	10	2	1	2	77.7333	0	77.7333	0	77.7333	0	77.7333	0	0	0	1	GSM816112	9.07828	10.026	10.1302	10.0725
3	1	320	20	1	0	1	77.8667	0	77.8667	0	77.8667	0	77.8667	0	0	0	1	GSM816063	9.37954	10.7494	9.53728	10.3805
3	1	40	0	4	2	4	78	0	78	0	78	0	78	0	1	0	1	GSM816141	10.1469	10.923	11.0467	11.6478
3	1	160	10	2	3	4	78.4333	0	78.4333	0	78.4333	0	78.4333	0	1	0	1	GSM816108	10.7363	11.0632	10.4118	10.475
3	1	1280	160	4	3	4	78.9	0	78.9	0	78.9	0	78.9	0	0	1	1	GSM816042	9.72417	9.83141	9.10379	10.3015
3	0	0	0	1	0	1	79.1	0	79.1	0	79.1	0	79.1	0	0	1	1	GSM816102	9.71877	9.73036	9.50987	11.0319
3	1	160	10	2	1	2	79.2	0	24.7667	1	79.2	0	24.7667	1	0	0	1	GSM816114	8.99857	9.4375	9.74712	9.59331
3	1	640	40	1	2	3	79.3	0	79.3	0	79.3	0	79.3	0	1	1	1	GSM816065	9.44572	9.2703	9.72417	10.034
3	1	640	40	4	1	4	80.1333	0	80.1333	0	80.1333	0	80.1333	0	0	1	1	GSM816093	9.66853	9.89006	10.1134	9.75855
3	1	320	80	3	1	3	80.9	0	80.9	0	80.9	0	80.9	0	0	0	1	GSM816083	8.96903	9.51413	9.30247	9.42006
3	1	320	40	3	1	3	81.2	0	81.2	0	81.2	0	81.2	0	1	0	1	GSM816117	9.82526	9.89006	9.13703	11.5322
3	1	640	160	2	1	2	81.6667	0	81.6667	0	81.6667	0	81.6667	0	0	1	1	GSM816060	9.19887	9.26679	9.24634	9.25961
3	0	0	0	1	0	1	81.7	0	81.7	0	81.7	0	81.7	0	0	1	0	GSM816089	9.90989	9.68524	10.3119	10.4327
3	1	160	10	3	3	4	81.9667	0	81.9667	0	81.9667	0	81.9667	0	0	1	1	GSM816067	9.72417	9.47053	10.3408	10.6317
3	1	640	160	3	1	3	81.9667	0	81.9667	0	81.9667	0	81.9667	0	0	1	1	GSM816097	9.78226	9.81913	9.91711	10.4217
3	1	160	10	1	1	2	82.1333	0	82.1333	0	82.1333	0	82.1333	0	1	1	0	GSM816101	10.878	10.4859	9.81286	10.1052
3	1	80	10	1	0	1	82.6333	0	82.6333	0	82.6333	0	82.6333	0	0	0	1	GSM816069	9.30592	9.73036	9.56471	10.475
3	1	320	40	1	2	3	84	0	84	0	84	0	84	0	0	1	0	GSM816075	10.5821	10.475	11.0165	11.08
3	1	640	40	1	3	4	84.3667	0	84.3667	0	84.3667	0	84.3667	0	1	1	0	GSM816052	10.0415	10.2644	9.39567	11.3878
3	1	640	60	3	1	3	84.9	0	21.7667	1	84.9	0	21.7667	1	1	1	1	GSM816058	8.95037	9.27751	8.78476	10.2275
3	1	320	40	4	1	4	85.3333	0	85.3333	0	85.3333	0	85.3333	0	0	0	1	GSM816051	8.86407	9.60212	9.10379	9.6793
3	1	320	10	1	1	2	85.5333	0	85.5333	0	85.5333	0	85.5333	0	0	0	1	GSM816080	8.78121	10.3215	8.96903	11.0632
3	1	640	40	1	2	3	85.7667	0	85.7667	0	85.7667	0	85.7667	0	1	0	1	GSM816076	10.8486	10.2644	10.0891	10.7627
3	1	40	0	1	0	1	85.9	0	85.9	0	85.9	0	85.9	0	0	1	1	GSM816054	9.47053	9.65262	10.2551	10.9689
3	1	160	10	4	1	4	86	0	86	0	86	0	86	0	0	0	1	GSM816078	9.36301	10.3313	10.2182	11.1142
3	1	640	80	1	1	2	86.5667	0	86.5667	0	86.5667	0	86.5667	0	0	0	1	GSM816092	10.7234	10.4529	10.2925	11.2343
3	0	0	0	2	1	2	86.9	0	86.9	0	86.9	0	86.9	0	0	1	0	GSM816046	9.69069	10.9532	10.0644	11.8619
3	1	640	160	1	1	2	87.0667	0	87.0667	0	87.0667	0	87.0667	0	0	1	1	GSM816047	8.56709	9.25255	8.54972	9.19564
2	0	0	0	1	2	3	87.4667	0	87.4667	0	87.4667	0	87.4667	0	0	1	1	GSM816079	9.89681	9.27751	9.90343	10.7892
3	1	640	40	1	1	2	87.8	0	87.8	0	87.8	0	87.8	0	1	0	1	GSM816091	9.85669	10.274	10.0492	11.5322
3	0	0	0	2	3	4	87.9333	0	87.9333	0	87.9333	0	87.9333	0	1	1	1	GSM816049	9.64241	9.90343	10.3313	10.5946
3	1	320	0	2	1	2	88	0	88	0	88	0	88	0	0	0	1	GSM816085	9.07516	10.0891	8.95747	9.30939
3	1	640	60	2	2	3	88.1	0	88.1	0	88.1	0	88.1	0	0	1	1	GSM816099	10.7627	11.2906	10.696	10.8021
3	1	80	0	1	1	2	88.3333	0	88.3333	0	88.3333	0	88.3333	0	0	1	1	GSM816041	9.70158	9.8693	10.1645	10.0492
3	1	640	160	4	1	4	88.4	0	88.4	0	88.4	0	88.4	0	0	1	0	GSM816044	9.31663	10.5821	8.83243	11.1836
3	1	320	40	1	1	2	88.5	0	88.5	0	88.5	0	88.5	0	1	1	1	GSM816082	9.78226	10.558	9.75855	11.4265
3	1	640	160	4	1	4	89.1333	0	89.1333	0	89.1333	0	89.1333	0	1	1	0	GSM816038	9.84706	10.3912	11.3509	10.0768
3	1	10	0	3	2	3	89.2667	0	89.2667	0	89.2667	0	89.2667	0	1	0	0	GSM816040	10.4009	10.2839	10.7892	10.8486
3	1	640	160	4	1	4	90.1	0	90.1	0	90.1	0	90.1	0	0	1	1	GSM816064	10.3805	10.2372	8.83042	11.696
3	1	320	10	3	1	3	90.1667	0	90.1667	0	90.1667	0	90.1667	0	0	0	1	GSM816072	9.53248	9.14305	9.32049	9.42006
2	1	10	0	1	0	1	91.8667	0	91.8667	0	91.8667	0	91.8667	0	0	1	1	GSM816059	9.35876	9.98923	9.74165	10.5445
